# Supplementary material
Source: PubMed Central journal article supplement (PMC3859149)
Supplement: 10-1055-s-0033-1350761-sup_gf675de.pdf [file 10-1055-s-0033-1350761-sup_gf675de.pdf]

# Wissen und Verhalten junger Menschen bezüglich Fertilitätsrisiken – Ergebnisse einer Befragung

## Knowledge and Behaviour of Young People Concerning Fertility Risks – Results of a Questionnaire

### Autoren

J. Fügener<sup>1</sup>, A. Matthes<sup>2</sup>, B. Strauß<sup>1</sup>

### Institute

<sup>1</sup> Institut für Psychosoziale Medizin und Psychotherapie, Universitätsklinikum Jena, Jena

<sup>2</sup> Klinik für Psychiatrie und Psychotherapie, Universitätsklinikum Jena, Jena

### Schlüsselwörter

- Wissen zur Fertilität
- Lifestyle
- ungewollte Kinderlosigkeit
- Prävention

### Key words

- knowledge about fertility
- lifestyle
- involuntary childlessness
- prevention

### Zusammenfassung

**Fragestellung:** Ziel der Studie war es, angesichts steigender Zahlen ungewollt kinderloser Paare, den Wissensstand junger Menschen im fertilen Alter hinsichtlich Risiken für Fertilitätsstörungen und ihr eigenes Risikoverhalten zu beschreiben. Außerdem sollte ein Zusammenhang zwischen diesen Aspekten und den Kinderwunschmotiven, Persönlichkeitsmerkmalen und der psychischen Befindlichkeit geprüft werden.

**Material und Methode:** Es wurden 498 Frauen und Männer zwischen 18 und 30 Jahren schriftlich anonym befragt. Die Stichprobe bestand aus 153 Medizinstudierenden, 190 Studierenden anderer Fachrichtungen und 155 Berufsschülern. Das Wissen wurde anhand offener Fragen zur Reproduktion getestet. Zur Beurteilung des Risikoverhaltens wurde ein Summenwert aus relevanten Lifestyle-Faktoren gebildet. Die psychische Befindlichkeit wurde mit dem „Gesundheitsfragebogen für Patienten“ PHQ-D untersucht, weiterhin wurden „Der Leipziger Fragebogen zu Kinderwunschmotiven“ und die Kurzversion des „Big Five Inventory“ BFI-K eingesetzt.

**Ergebnisse:** Die Probanden kannten Risiken für Fertilitätsstörungen, wichteten aber ihren Einfluss auf die Fertilität nicht immer zutreffend. Das Wissen zur Reproduktion war eher gering (durchschnittlich 6,3 von 16 Punkten). Medizinstudierende hatten einen signifikant besseren Kenntnisstand und verhielten sich auch risikoärmer als die anderen beiden Gruppen. Depressivität und Risikoverhalten korrelierten positiv, emotionale Aspekte spielten für die Einstellung zum Kinderwunsch die größte Rolle. Risikoverhalten ließ sich am besten durch die Variablen Depressivität, mangelndes Wissen und das Gefühl, durch Kinder persönlich eingeschränkt zu sein, vorhersagen.

**Diskussion:** Wissenslücken zum Thema Fertilität und Reproduktion können ein Grund für risiko-

### Abstract

**Purpose:** The aim of this study was, in the light of the increasing number of involuntarily childless couples, to investigate the state of knowledge of young people of fertile age about the risks for fertility disorders and their own risk behaviour. In addition, we wanted to check for a relationship between these aspects and the motives for wanting children, individual personality traits and psychological status.

**Materials and Methods:** 498 women and men between the ages of 18 and 30 years participated in an anonymous survey. The sample consisted of 153 medical students, 190 students from other faculties and 155 vocational trainees. Their knowledge was tested by way of open questions on reproduction. The sum total from relevant life-style factors was used to estimate their risk-taking behaviour. Their psychic states were examined using the Health Questionnaire for Patients “Gesundheitsfragebogen für Patienten” PHQ-D, in addition the Leipzig Questionnaire on Motives for Wanting Children “Der Leipziger Fragebogen zu Kinderwunschmotiven” and the short version of the “Big Five Inventory” BFI-K were used.

**Results:** The participants were aware of the risks for fertility disorders but did not always correctly assess their influence on fertility. Their knowledge about reproduction was rather low (on average 6.3 from 16 points). Medical students had a significantly higher state of knowledge and exhibited less risky behaviour as compared to the other two groups. Depressiveness and risky behaviour correlated positively and emotional aspects played the major role in attitudes towards having children. Risk behaviour was best predicted by the variables depressiveness, low level of knowledge and the feeling of being restricted in personal life by children.

**Discussion:** Lack of knowledge on the topics fertility and reproduction could be a reason for risky

eingereicht 12.1.2013

revidiert 18.6.2013

akzeptiert 26.7.2013

### Bibliografie

**DOI** <http://dx.doi.org/10.1055/s-0033-1350761>  
Geburtsh Frauenheilk 2013; 73:  
1–9 © Georg Thieme Verlag KG  
Stuttgart · New York ·  
ISSN 0016-5751

### Korrespondenzadresse

**Josephine Fügener**  
Universitätsklinikum Jena  
Institut für Psychosoziale  
Medizin und Psychotherapie  
Stoysstraße 3  
07740 Jena  
josephine.fuegener@  
uni-jena.de

reiches Verhalten und somit für einen negativen Einfluss von Lifestyle-Faktoren auf die Fertilität sein. Junge Menschen kennen zwar Risikofaktoren, welche die Fruchtbarkeit beeinflussen, verhalten sich aber nicht immer entsprechend. Primärprävention bzw. Aufklärung sind deshalb nötig, um eine weiter steigende Zahl infertiler Paare zu verhindern.

## Einleitung

Das niedrige Geburtenniveau und die daraus resultierende Kinderlosigkeit in Deutschland sind erst in den letzten Jahren zu einem viel diskutierten Thema geworden, obwohl die Geburtenrate bereits seit mehr als 30 Jahren auf einem konstanten Niveau von etwa 1,4 Kindern je Frau liegt und damit zu den niedrigsten der Welt zählt. Um eine gleichbleibende Bevölkerungsgröße zu sichern, wären etwa 2,1 Kinder je Frau nötig. Die durchschnittliche Kinderzahl wird maßgeblich von 2 Faktoren beeinflusst: der Zahl der Kinder je Mutter, die weitgehend stabil ist, und der Anzahl der kinderlosen Frauen, die in den letzten Jahrzehnten kontinuierlich angestiegen ist und somit als bestimmender Faktor für das niedrige Geburtenniveau anzusehen ist [1].

Der aus der Kinderlosigkeit resultierende demografische Wandel wird zum gesellschaftlichen Problem: Nach Angaben des Statistischen Bundesamtes hatten 2008 21% der 40- bis 44-jährigen Frauen keine Kinder geboren, wohingegen unter den 10 bzw. 20 Jahre älteren Frauen nur 16 bzw. 12% kinderlos waren [1]. In Deutschland wünschen sich Frauen im Durchschnitt 1,75 Kinder und sind mit dieser Zahl bereits Schlusslicht in Europa [2]. Würden tatsächlich etwa 1,7 Kinder je Frau geboren, ließe sich die Bevölkerungszahl Deutschlands mit einer jährlichen Zuwanderung von 200 000 Personen weitestgehend konstant halten [3]. Da tatsächlich nur circa 1,4 Kinder je Frau geboren werden folgt, dass – bleibt die Zuwanderung unberücksichtigt – jede Kindergeneration um ein Drittel geringer ist als die ihrer Eltern, wodurch die Bevölkerung binnen dreier Generationen auf ein Drittel schrumpfen würde [3].

Stöbel-Richter et al. berichteten sowohl von einem Anstieg der gewollten als auch der ungewollten Kinderlosigkeit aufgrund von Fertilitätsstörungen [4]. Laut einer Umfrage des Instituts für Demoskopie Allensbach wollen oder wollten nur etwa 8% der erwachsenen Deutschen zwischen 25 und 59 Jahren ausdrücklich niemals Kinder [3], mehr als 30% dieser Altersgruppe haben keine oder noch keine Kinder. 22% der Altersgruppe wünschen sich zurzeit Kinder oder haben sich früher einmal Kinder gewünscht (14%). Insgesamt waren es also 36% der befragten Frauen und Männer, deren Wunsch nach einem ersten oder weiteren Kind bisher nicht in Erfüllung ging. Soziale Gründe, wie eine fehlende stabile Partnerschaft [3], finanzielle Überlegungen (Kinderlose sind laut ökonomischen Studien besser gestellt als Familien) oder medizinische Gründe können hierbei eine Rolle spielen.

Die Unterscheidung zwischen gewollter und ungewollter Kinderlosigkeit gestaltet sich nicht immer einfach. Viele Paare verschieben das Kinderkriegen aufgrund ihrer Karriereplanung und/oder fühlen sich zum Kinderkriegen noch zu jung. Ist dann der individuell passende Zeitpunkt für die Elternrolle gefunden, kann aus der zunächst gewollten schnell eine ungewollte Kinderlosigkeit werden, da die Fertilität mit steigendem Alter des Mannes, besonders aber der Frau, abnimmt [3]. Schuld daran ist vor allem die sinkende Qualität der Spermien und Eizellen. Für Frauen ab 30 Jahren geht jedes zusätzliche Lebensjahr mit einer Reduktion von 13% einher, ein Kind lebend zu gebären [5]. Homan et al. [6]

behaviour and thus have a negative impact on lifestyle factors relating to fertility. Young people are aware of the risk factors that may affect fertility but do not always act accordingly. Primary prevention or, respectively, health promotion is thus necessary to prevent further increases in the number of infertile couples.

untersuchten in einem Review 2007 weitere die Fertilität beeinflussende Lebensstilfaktoren: Neben dem steigenden Alter ist der negative Einfluss von Gewicht und Nikotinabusus auf die Fruchtbarkeit unstrittig. Dabei haben sowohl Unter-, aber vor allem Übergewicht durch Störungen des Hormonhaushalts und ovarielle Dysfunktion beträchtliche Auswirkungen auf die Fruchtbarkeit: Frauen mit einem BMI >25 oder <19 kg/m<sup>2</sup> haben ein höheres Risiko, dass eine Schwangerschaft erst nach mehr als 12 Monaten eintritt als normalgewichtige Frauen [7]. Eine Prävention von Essstörungen bereits im Schulalter ist deshalb besonders wichtig [8]. Rauchen hat einen negativen Effekt auf die Fertilität von Männern bezüglich Produktion, Beweglichkeit und Morphologie der Spermien, begleitet von einer erhöhten Anzahl von DNA-Schäden der Keimzellen [9] und führt bei Frauen zu Reifungsstörungen der Eizellen und Störungen des Hormonhaushalts während der Gelbkörperphase. Durch früheren Eintritt von Raucherinnen in die Wechseljahre (durchschnittlich 1–4 Jahre eher) wird die fruchtbare Zeit außerdem verkürzt [10].

Mögliche Effekte von Ernährungsgewohnheiten, fehlender sportlicher Aktivität, psychischem Stress, Koffein- und Alkoholabusus auf die spontane Reproduktion werden in der Literatur noch kontrovers diskutiert [11], allerdings ist der günstige Einfluss auf die allgemeine Gesundheit bei Vermeidung unumstritten. Eine randomisierte, kontrollierte Studie zur Frage, ob eine Prävention – beispielsweise eine Lebensstilberatung – einen positiven Effekt in der Risikopopulation hätte, gibt es noch nicht [12]. Bislang ebenfalls noch relativ ungeklärt sind gängige Einstellungen und Mythen zur Fertilität, insbesondere unter jungen Menschen, und die Frage, was bezüglich der fertilitätsmindernden Risikofaktoren in der Bevölkerung überhaupt bekannt und präsent ist. Vielen Menschen scheint beispielsweise nicht bewusst zu sein, dass sie Chancen vergeben, wenn sie den Kinderwunsch aufschieben. In neueren Studien (Bunting und Boivin 2008 [13]; Bretherick et al. 2010 [14]), die das Wissen über den Einfluss bestimmter Lebensstilfaktoren (darunter das Alter) auf die Fertilität erfassten, wussten die Befragten wenig über spezifische Risiken. Bei Bunting und Boivin (2008) glaubten die befragten Studentinnen fälschlicherweise an bestimmte Mythen und „pseudoprotektive Faktoren“ (z.B. höhere Fruchtbarkeit beim Leben auf dem Land, erhöhte Wahrscheinlichkeit einer Konzeption nach Adoption).

Das unfreiwillige Ausbleiben einer Schwangerschaft kann verschiedene medizinische und biologische Ursachen haben. Dabei verteilen sich die Störungen etwa gleichwertig zu jeweils 30–40% auf die Geschlechter, zu etwa 15–30% können kombinierte Ursachen bei beiden Partnern zu finden sein [3]. Bei Frauen stehen neben Hormonimbalancen Infektionen, zum Beispiel mit Chlamydien, Fehlbildungen und die Endometriose im Vordergrund, bei Männern Motilitäts- und Bildungsstörungen der Spermien, seltener Störungen des Hodens selbst.

Für die Entwicklung von präventiven Maßnahmen wäre jene kinderlose Gruppe der Bevölkerung, die gern Nachwuchs (gehabt) hätte – laut Allensbach-Umfrage circa 1,4 Mio. Menschen in Deutschland – geeignet, um von Verbesserungen der Familienpolitik sowie von Informationen über eine mögliche Beeinflussung

sung von Lebensstilfaktoren, die auf die Fertilität wirken, zu profitieren. Diese Gruppe ist allerdings erfahrungsgemäß schwer zugänglich [15].

Die vorliegende Querschnittsstudie sollte das Wissen junger Menschen bezüglich Lifestyle, Fertilität und Fertilitätsrisiken sowie ihr Risikoverhalten erfassen und diese Aspekte mit der Einstellung zum Kinderwunsch, Persönlichkeitsmerkmalen und dem psychischen Befinden in Bezug setzen. Letztlich soll die Studie dazu beitragen, Ansätze für die Prävention von Fertilitätsstörungen weiter zu entwickeln.

## Material und Methode

Im Rahmen der Studie wurden Studierende und Berufsschüler aus dem Raum Jena im Rahmen einer Querschnittsstudie mittels eines anonymen Fragebogens zu ihrem Wissen und Verhalten in Bezug auf Risiken für Fertilitätsstörungen befragt. Es wurden 3 verschiedene Gruppen differenziert: Medizinstudierende der Friedrich-Schiller-Universität Jena in den klinischen Semestern vor Beginn des Praktischen Jahres (MS), Studierende anderer Fachrichtungen der selben Universität (AS) und Berufsschüler des Staatlichen Berufsbildenden Schulzentrums Jena-Göschwitz sowie der Staatlichen Berufsbildenden Schule für Gesundheit und Soziales Jena (BS).

## Stichprobe

In die Stichprobe wurden 498 junge Männer und Frauen zwischen 18 und 30 Jahren eingeschlossen (Durchschnittsalter  $M = 22,04$  Jahre,  $SD = 2,5$ ,  $Min. = 18$ ,  $Max. = 30$ ). Davon waren 153 Medizinstudierende ( $M = 22,88$ ,  $SD = 2,1$ ,  $Min. = 20$ ,  $Max. = 30$ , davon 69,3% Frauen, 30,7% Männer), 190 Studierende anderer Fachrichtungen ( $M = 22,03$ ,  $SD = 2,4$ ,  $Min. = 18$ ,  $Max. = 30$ , davon 56,3% Frauen, 43,7% Männer) und 155 lernten an einer Berufsschule ( $M = 21,23$ ,  $SD = 2,8$ ,  $Min. = 18$ ,  $Max. = 29$ , davon 60,0% Frauen, 40,0% Männer). Insgesamt beantworteten 306 Frauen (61,4%) und 192 Männer (38,6%) den Fragebogen. Die meisten von ihnen hatten als höchsten bisher erworbenen Abschluss das Abitur bzw. die Fachhochschulreife erreicht (68,1%), ein geringerer Teil verfügte über einen Realschulabschluss (24,1%), eine abgeschlossene Berufsausbildung (3,8%), ein bereits abgeschlossenes Studium (3,0%) oder einen Hauptschulabschluss (1%). In der

Gruppe der Studierenden lag der Anteil derjenigen mit Abitur erwartungsgemäß höher als bei den Berufsschülern, die am häufigsten einen Realschulabschluss hatten (● Tab. 1).

## Erhebungsinstrumente

Für die Befragung zu den fertilitätsrelevanten Themen wurde vornehmlich ein neu entwickelter Fragebogen mit Antwortvorgaben (Ja-/Nein-Antwortmöglichkeiten) und Freitext verwendet, der sich inhaltlich an der Studie von Bunting und Boivin [13] orientierte. Der Bogen erfasste außerdem soziografische Merkmale mit 6 Items (Beruf/momentane Tätigkeit, Alter, Geschlecht, Größe, Gewicht, höchster bisher erworbener Abschluss), die vorhandenen Kenntnisse zum Thema Fertilität und Reproduktion sowie deren Bewertung (insgesamt 43 Items) und die Lebensgewohnheiten der Probanden (22 Items).

Im Anschluss an die Angaben zur Soziodemografie wurde die Auseinandersetzung mit Fertilitätsstörungen in der Vergangenheit (Ja-/Nein-Antwort) und gegebenenfalls Gründe dafür erfragt (Freitext), bekannte Risiken für Störungen der Fruchtbarkeit von Frau und Mann ermittelt (Freitext) und gefragt, ob sich die Probanden eine umfassendere Information über Fruchtbarkeitsstörungen, z.B. in Form von Plakaten, wünschten (ja/nein).

In einem weiteren Teil wurden den Probanden Items (● Tab. 2) vorgegeben, die sie im Hinblick darauf bewerten sollten, ob und in wie weit diese Verhaltensweisen und Lebensumstände für sie Risiken für die Fertilität darstellen. Dies konnte anhand einer 5-stufigen Skala von „ja, das trifft zu“ (= Punktwert 5) bis „nein, das trifft nicht zu“ (= Punktwert 1) eingeschätzt werden. Im Anschluss sollten noch einmal die 3 größten Fruchtbarkeitsrisiken für Frauen bzw. Männer aufgelistet werden.

Das spezifische Wissen der Teilnehmer wurde auf der Basis von 8 Fragen zum Thema Reproduktion erhoben. Dabei wurden folgende Aspekte erfragt: Alter der Frau bei 50% Abnahme der Fruchtbarkeit, spontane Schwangerschaftsrate zwischen 20–25 bzw. über 40 Jahren, Beginn und Dauer der fruchtbaren Tage einer Frau im Zyklus, Dauer der Befruchtungsfähigkeit von Eizelle bzw. Spermien, Prozentzahl der in Deutschland ungewollt kinderlosen Paare. Die Ergebnisse wurden mit 0, 1 oder 2 Punkten je nach Abweichung zur korrekten Antwort bewertet und daraus ein Summenscore gebildet. Je nach erreichter Punktzahl wurden die Teilnehmer in 3 Gruppen unterteilt: geringer (0–5 Punkte), mäßiger (6–10 P.) und guter Wissensstand (11–16 P.).

Tab. 1 Soziodemografische Charakterisierung der Stichprobe.

|                                   | Medizinstudierende | Studierende anderer Fachrichtungen | Berufsschüler | gesamt      |
|-----------------------------------|--------------------|------------------------------------|---------------|-------------|
| gesamt n (%)                      | 153 (30,7%)        | 190 (38,2%)                        | 155 (31,1%)   | 498 (100%)  |
| Alter                             |                    |                                    |               |             |
| ▶ M                               | 22,88              | 22,03                              | 21,23         | 22,04       |
| ▶ SD                              | 2,14               | 2,38                               | 2,75          | 2,51        |
| Geschlecht                        |                    |                                    |               |             |
| ▶ Frauen                          | 106 (69,3%)        | 107 (56,3%)                        | 93 (60,0%)    | 306 (61,4%) |
| ▶ Männer                          | 47 (30,7%)         | 83 (43,7%)                         | 62 (40,0%)    | 192 (38,6%) |
| Abschluss                         |                    |                                    |               |             |
| ▶ Hauptschule                     | 0                  | 0                                  | 5 (3,2%)      | 5 (1%)      |
| ▶ Realschule                      | 0                  | 0                                  | 120 (77,4%)   | 120 (24,1%) |
| ▶ Abitur                          | 149 (97,4%)        | 178 (93,7%)                        | 12 (7,7%)     | 339 (68,1%) |
| ▶ abgeschlossene Berufsausbildung | 0                  | 1 (0,5%)                           | 18 (11,6%)    | 19 (3,8%)   |
| ▶ abgeschlossenes Studium         | 4 (2,6%)           | 11 (5,8%)                          | 0             | 15 (3,0%)   |

M: Mittelwert, SD: Standardabweichung

**Tab. 2** Bewertung der Risiken für die Fertilität: Mittelwerte und Standardabweichungen der 3 Subgruppen, die mittels einfaktorieller ANOVA verglichen wurden. Die Faktoren waren auf einer Skala von 1 („nein, das trifft nicht zu“) bis 5 („ja, das trifft zu“) einzuschätzen (Faktoren, die signifikant unterschiedlich bewertet wurden, sind im Fettdruck dargestellt).

| Faktor                                            | M –<br>MS | SD –<br>MS | M –<br>AS | SD –<br>AS | M –<br>BS | SD –<br>BS | M –<br>gesamt | SD –<br>gesamt | F(2)  | p                |
|---------------------------------------------------|-----------|------------|-----------|------------|-----------|------------|---------------|----------------|-------|------------------|
| Drogen                                            | 4,63      | 0,78       | 4,72      | 0,73       | 4,51      | 1,10       | 4,63          | 0,88           | 2,42  | 0,090            |
| <b>steigendes Alter der Frau</b>                  | 4,78      | 0,57       | 4,63      | 0,70       | 4,43      | 1,06       | 4,61          | 0,80           | 7,34  | <b>0,001</b>     |
| <b>Hormonstörungen</b>                            | 4,86      | 0,49       | 4,50      | 0,91       | 4,31      | 1,09       | 4,55          | 0,90           | 15,59 | <b>&lt;0,001</b> |
| <b>Strahlung/Bestrahlung</b>                      | 4,77      | 0,56       | 4,49      | 0,84       | 4,36      | 1,13       | 4,54          | 0,89           | 9,07  | <b>&lt;0,001</b> |
| Alkohol                                           | 4,52      | 0,75       | 4,57      | 0,72       | 4,42      | 1,01       | 4,51          | 0,83           | 1,55  | 0,214            |
| Rauchen                                           | 4,46      | 0,84       | 4,49      | 0,83       | 4,38      | 0,97       | 4,45          | 0,88           | 0,76  | 0,467            |
| <b>Chemotherapie</b>                              | 4,73      | 0,64       | 4,37      | 0,91       | 4,25      | 1,16       | 4,44          | 0,95           | 11,55 | <b>&lt;0,001</b> |
| Krankheiten der Genitalien                        | 4,39      | 0,80       | 4,29      | 0,88       | 4,21      | 1,06       | 4,30          | 0,92           | 1,35  | 0,261            |
| <b>Doping</b>                                     | 4,50      | 0,85       | 4,19      | 0,98       | 4,17      | 1,20       | 4,28          | 1,03           | 5,15  | <b>0,006</b>     |
| <b>genetische Vorbelastung</b>                    | 4,36      | 0,82       | 4,24      | 0,86       | 4,01      | 1,19       | 4,21          | 0,97           | 5,12  | <b>0,006</b>     |
| <b>Verletzungen/OPs im Bereich der Genitalien</b> | 4,39      | 0,78       | 4,10      | 1,00       | 4,02      | 1,13       | 4,17          | 0,99           | 6,20  | <b>0,002</b>     |
| <b>Stress</b>                                     | 4,41      | 0,67       | 4,09      | 0,78       | 3,99      | 0,94       | 4,16          | 0,82           | 10,97 | <b>&lt;0,001</b> |
| <b>Untergewicht</b>                               | 4,68      | 0,69       | 4,00      | 1,05       | 3,82      | 1,35       | 4,15          | 1,12           | 28,29 | <b>&lt;0,001</b> |
| Medikamenteneinnahme                              | 4,13      | 0,86       | 4,13      | 0,90       | 4,08      | 1,11       | 4,11          | 0,95           | 0,15  | 0,862            |
| <b>sexuell übertragbare Krankheiten</b>           | 4,29      | 0,98       | 3,86      | 1,09       | 3,95      | 1,25       | 4,02          | 1,12           | 6,90  | <b>0,001</b>     |
| Übergewicht                                       | 3,80      | 1,14       | 3,69      | 1,21       | 3,84      | 1,29       | 3,77          | 1,22           | 0,69  | 0,504            |
| Rückgängigmachen einer Sterilisation              | 3,84      | 1,19       | 3,83      | 1,15       | 3,56      | 1,39       | 3,75          | 1,25           | 2,66  | 0,071            |
| steigendes Alter des Mannes                       | 3,65      | 1,28       | 3,74      | 1,31       | 3,72      | 1,44       | 3,70          | 1,34           | 0,21  | 0,815            |
| Depression                                        | 3,78      | 0,99       | 3,56      | 1,10       | 3,55      | 1,26       | 3,62          | 1,12           | 2,11  | 0,122            |
| <b>psychische Belastung</b>                       | 3,92      | 0,94       | 3,47      | 1,20       | 3,29      | 1,33       | 3,55          | 1,20           | 11,74 | <b>&lt;0,001</b> |
| <b>Umweltbelastung</b>                            | 3,84      | 1,01       | 3,43      | 1,00       | 3,25      | 1,25       | 3,50          | 1,11           | 11,58 | <b>&lt;0,001</b> |
| körperliche Beschwerden                           | 3,41      | 1,11       | 3,33      | 1,05       | 3,35      | 1,14       | 3,36          | 1,10           | 0,26  | 0,775            |
| <b>chronische Krankheiten</b>                     | 3,63      | 1,16       | 3,27      | 1,03       | 3,14      | 1,18       | 3,34          | 1,14           | 8,04  | <b>&lt;0,001</b> |
| <b>Angststörung</b>                               | 3,67      | 1,05       | 3,25      | 1,12       | 3,13      | 1,27       | 3,34          | 1,17           | 9,40  | <b>&lt;0,001</b> |
| <b>Krankheiten des Immunsystems</b>               | 3,45      | 0,91       | 3,24      | 1,01       | 3,11      | 1,13       | 3,26          | 1,03           | 4,34  | <b>0,014</b>     |
| <b>Kinderkrankheiten, z. B. Mumps</b>             | 3,50      | 1,35       | 3,06      | 1,31       | 2,99      | 1,32       | 3,18          | 1,34           | 6,78  | <b>0,001</b>     |
| <b>Leistungssport</b>                             | 3,53      | 1,16       | 2,84      | 1,23       | 2,65      | 1,24       | 2,99          | 1,27           | 22,32 | <b>&lt;0,001</b> |
| Schlafprobleme                                    | 2,79      | 0,92       | 2,79      | 1,06       | 2,81      | 1,22       | 2,79          | 1,07           | 0,11  | 0,989            |
| mangelnde Bewegung                                | 2,63      | 1,12       | 2,76      | 0,98       | 2,88      | 1,26       | 2,76          | 1,12           | 2,02  | 0,134            |

MS: Medizinstudierende, AS: Studierende anderer Fachrichtungen, BS: Berufsschüler, M: Mittelwert, SD: Standardabweichung, einfaktorielle ANOVA: F(df): F-Wert, df: Freiheitsgrade (= 2), p: Signifikanz, Irrtumswahrscheinlichkeit  $p < 0,05$

Mithilfe von 18 Items wurde schließlich ein Risikoscore für die Probanden erstellt. Für jeden der in **Tab. 3** dargestellten Risikofaktoren wurde im Falle einer Zustimmung 1 Punkt vergeben und daraus die Summe gebildet (maximaler Summenscore: 25 Punkte).

Zusätzlich wurden als standardisierte Instrumente „Der Leipziger Fragebogen zu Kinderwunschmotiven“ (LKM, 20 Items) verwendet, der jeweils 5 Items einer der 4 faktorenanalytisch konstruierten Skalen „Emotionale Stabilisierung und Sinnfindung“, „Persönliche Einschränkungen und Probleme“, „Soziale Anerkennung und Identitätsbildung“ sowie „Unzureichende materielle und soziale Unterstützung“ zuordnet [16]. Außerdem wurde die Kurzversion des „Big Five Inventory“ (BFI-K, 21 Items) benutzt, die eine Erfassung des 5-Faktoren-Modells der Persönlichkeit in einer kürzeren Zeit als die Originalversion, aber mit ebenfalls zufriedenstellenden psychometrischen Kennwerten zulässt [17]. Der „Gesundheitsfragebogen für Patienten“ (Kurzform PHQ-D, 15 Items) schließlich testet depressive Störungen, Panikstörungen und die allgemeine psychosoziale Funktionsfähigkeit [18]. Es ist bekannt, dass insbesondere affektive Symptome das Gesundheitsverhalten einschließlich der Prävention maßgeblich beeinflussen [19]. Besonders gut ist dies für depressive Symptome belegt, die oft mit einer negativen Haltung gegenüber der eigenen Person und der Zukunft verbunden sind. Auf diesem Hintergrund sollte in dieser Studie explizit ein Zusammenhang zwi-

schen Depressivität (erfasst mittels PHQ-D) und dem Risikoverhalten geprüft werden. Im PHQ-D (maximaler Skalensummenwert: 27 Punkte) entspricht ein Skalensummenwert unter 5 Punkten dem Fehlen einer depressiven Störung, während ein Punktwert zwischen 5–10 eine leichte oder unterschwellige depressive Störung milden Schweregrads kennzeichnet; Werte ab einem Punktwert von 10 und höher sind charakteristisch für eine Major Depression [18].

### Statistische Analyse

Die statistische Auswertung erfolgte mit dem Computerprogramm SPSS Version 19. Neben deskriptiven Statistiken wurden Korrelationskoeffizienten nach Spearman berechnet, Subgruppen wurden mit t-Tests bzw. einfaktorieller ANOVA verglichen. Schließlich wurde eine multiple schrittweise Regression berechnet, um das Risiko für Fertilitätsstörungen vorherzusagen. Als Irrtumswahrscheinlichkeit wurde  $p < 0,05$  festgelegt.

### Ergebnisse

#### ▼ Auseinandersetzung mit dem Thema

In der Befragung gaben nur insgesamt 22,5% der Befragten an, sich bereits schon einmal mit Risiken für Fertilitätsstörungen auseinandergesetzt zu haben. Während bei den AS lediglich

**Tab. 3** Übersicht über die Variablen, die in die Berechnung des Risikoscores für jeden einzelnen Probanden eingingen (und deren Gewichtung).

| Risikofaktor                                                                                 | Bewertung<br>(in Punkten)    |
|----------------------------------------------------------------------------------------------|------------------------------|
| fehlende Bewegung                                                                            | 1                            |
| Leistungssport                                                                               | 1                            |
| Doping                                                                                       | 1                            |
| Gewichtszu- oder -abnahme von mehr als 10 kg innerhalb eines halben Jahres                   | 1                            |
| beruflich schwere körperliche Arbeit                                                         | 1                            |
| Nikotinabusus:                                                                               |                              |
| ▶ weniger als 10 Zigaretten pro Tag                                                          | 1                            |
| ▶ mehr als 10 Zigaretten pro Tag                                                             | 2                            |
| Alkoholkonsum (täglich mehr als 2 Gläser Alkohol)                                            | 1                            |
| regelmäßiger Konsum von Drogen*                                                              | 1                            |
| Schlafstörungen                                                                              | 1                            |
| Exposition mit schädlichen Umwelteinflüssen:                                                 |                              |
| ▶ weniger als 10-mal pro Monat                                                               | 1                            |
| ▶ mehr als 10-mal pro Monat                                                                  | 2                            |
| chronische Krankheit                                                                         | 1                            |
| Behandlung mit Chemotherapie oder Bestrahlung                                                | 1                            |
| regelmäßige Medikamenteneinnahme                                                             | 1                            |
| fehlende feste Beziehung                                                                     | 1                            |
| Sterilisation                                                                                | 1                            |
| bisher keine gynäkologische/urologische Untersuchung                                         | 1                            |
| kein regelmäßiger Besuch beim Gynäkologen/Urologen                                           | 1                            |
| Leiden an einer STD (sexually transmitted disease)                                           | 1                            |
| Hormonstörungen                                                                              | 1                            |
| eigene bekannte Fertilitätsstörung                                                           | 1                            |
| Fertilitätsstörung in der Familie                                                            | 1                            |
| Abweichung des BMI (body mass index) vom Normalgewicht:                                      |                              |
| ▶ < 18,5 kg/m <sup>2</sup>                                                                   | 1                            |
| ▶ > 25 kg/m <sup>2</sup>                                                                     | 1                            |
| Erreichen eines Skalensummenwerts von mehr als 5 Punkten im PHQ-D-Fragebogen (Depressivität) | 1                            |
| <b>Summenwert</b>                                                                            | <b>maximal<br/>25 Punkte</b> |

\* Drogenkonsum sollte spezifiziert werden (insgesamt gaben 6,8% der Befragten an, „weiche“ Drogen wie Haschisch oder Marihuana einzunehmen)

14,7% vorher bereits Berührung mit dem Thema hatten, waren es bei den BS mit 20,6% und bei den MS mit 34,0% signifikant mehr ( $F[1] = 7,88$ ,  $p = 0,005$ ). Auch zwischen den Geschlechtern zeigte sich ein deutlicher Unterschied, Frauen machten den größeren Anteil (71,4%) derjenigen aus, die sich bereits mit dem Thema befasst hatten ( $F[1] = 6,13$ ,  $p = 0,014$ ). Bei 58,7% gab es für die Auseinandersetzung mit Risiken für Unfruchtbarkeit einen Grund, am häufigsten wurde hierbei eine eigene Krankheit oder eine Operation genannt (3,2% bezogen auf die Gesamtstichprobe), gefolgt vom Auftreten eines unerfüllten Kinderwunschs oder einer Fehlgeburt in der Umgebung (2,8%) sowie der Beschäftigung mit der Fragestellung während des Studiums (2,2%). Weitere Überlegungen der Probanden waren die eigene Schwangerschaft oder die der Partnerin (1,2%), die Konfrontation mit dem Thema während der Ausbildung (1,0%), der eigene unerfüllte Kinderwunsch (0,8%), Medienberichte (0,4%), ein verspätetes Einsetzen oder Ausbleiben der Periode (0,4%), Drogenkonsum oder Überlegungen zur Pilleneinnahme bzw. zur HPV-Impfung (jeweils 0,2%).

## Kenntnisse von Fertilitätsrisiken für Frau und Mann

Folgend auf die Aufforderung, bekannte Risiken für Fruchtbarkeitsstörungen bzw. Unfruchtbarkeit einer Frau zu nennen, wurden durchschnittlich 2,84 Antworten gegeben. MS ( $M = 3,52$ ,  $s = 2,09$ ) kannten signifikant mehr Risiken als AS ( $M = 2,58$ ,  $s = 1,71$ ) und BS ( $M = 2,48$ ,  $s = 1,95$ ) ( $F[2] = 14,14$ ,  $p < 0,001$ ). Frauen nannten im Mittel 3,05, Männer 2,51 Risiken im Freitext, dies war signifikant verschieden ( $F[1] = 9,18$ ,  $p = 0,003$ ). In der Rangfolge wurde das Rauchen von allen Befragten am häufigsten genannt (38,4%), gefolgt von Krankheiten der Genitalien (38,0%) und Drogenkonsum (23,7%) (● **Abb. 1**). MS nannten am häufigsten die Krankheiten der Geschlechtsorgane als Risiken für eine Unfruchtbarkeit der Frau (52,9% innerhalb der Berufsgruppe), gefolgt von sexuell übertragbaren Krankheiten (STD, 37,9%) und Rauchen (33,3%). Bei den anderen beiden Gruppen wurde das Rauchen am häufigsten genannt: bei den AS von 38,4%, bei den BS von 43,2%. Am zweit- und dritthäufigsten wurden Krankheiten des Genitaltrakts (34,7% innerhalb der AS, 27,1% innerhalb der BS) und Drogenkonsum (25,2%/31,0%) benannt.

Faktoren, die zu einer Unfruchtbarkeit des Mannes führen können, waren den Befragten weniger bekannt (im Mittel 2,6 Faktoren). Auch hier konnten die MS ( $M = 3,12$ ,  $s = 2,00$ ) signifikant mehr Risiken aufzählen als die AS ( $M = 2,39$ ,  $s = 1,60$ ) und die BS ( $M = 2,35$ ,  $s = 1,94$ ) ( $F[2] = 8,72$ ,  $p < 0,001$ ). Es gab keinen signifikanten Unterschied zwischen den Antworten der weiblichen und männlichen Studienteilnehmer. In der Rangfolge der Gesamtstichprobe lag das Rauchen erneut an 1. Stelle der Nennungen (41,2%), gefolgt von Krankheiten des Genitaltrakts (28,1%) und Alkoholkonsum (24,5%) (● **Abb. 1**). Von den MS wurden am häufigsten Krankheiten des Genitaltrakts benannt (44,4% innerhalb der Berufsgruppe), gefolgt von Rauchen (35,3%) und Umwelteinflüssen (30,1%). Bei den AS und BS stand das Rauchen an 1. Stelle der Angaben (40,5%/48,5%), Platz 2 und 3 belegten Drogen- (26,3%/29,0%) und Alkoholkonsum (23,7%/29,0%).

## Informationswunsch

Auf die Frage, ob sie sich umfassendere Informationen über Fruchtbarkeitsstörungen wünschten, antworteten insgesamt 62,4% der Studienteilnehmer mit „ja“. Vor allem die AS gaben einen großen Informationsbedarf an (64,7%), bei den BS waren es 61,9%, bei den MS 60,1%. Männer (50,5%) äußerten weniger häufig den Wunsch nach Aufklärung als Frauen (69,9%) ( $F[1] = 19,63$ ,  $p < 0,001$ ).

## Bewertung der Risiken für die Fertilität

Bei der Differenzierung der Risiken nach ihrer Bedeutung für die Fertilität wurden von allen Befragten insgesamt Drogen als einflussreichster Faktor benannt ( $M = 4,63$ ,  $s = 0,88$ , Min. = 1, Max. = 5), gefolgt vom steigenden Alter der Frau ( $M = 4,61$ ,  $s = 0,80$ ) und Hormonstörungen ( $M = 4,55$ ,  $s = 0,90$ ). Lediglich 3 der vorgegebenen Items wurden insgesamt als eher nicht die Fertilität beeinflussend eingeschätzt: Leistungssport ( $M = 2,99$ ), Schlafprobleme ( $M = 2,79$ ) und mangelnde Bewegung ( $M = 2,76$ , ● **Tab. 2**).

Während die AS und BS die stärkste Gewichtung auf Drogenkonsum, steigendes Alter der Frau und Alkoholkonsum legten, lagen in der Staffelung der MS Hormonstörungen, steigendes Alter der Frau und Strahlung/Bestrahlung am weitesten vorn. Insgesamt zeigten sich bei 17 Items signifikant höhere Bewertungen der MS gegenüber den anderen beiden Gruppen (● **Tab. 2**).

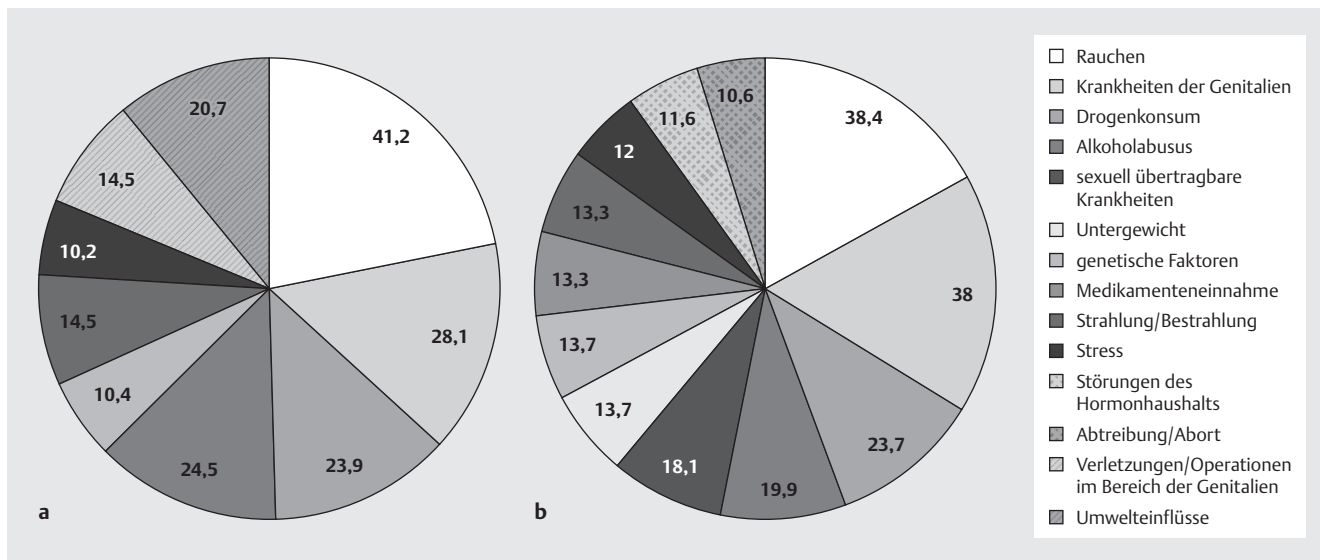

Abb. 1 a und b Vergleich: Häufigkeit der Nennungen (> 10%) von Risiken für Fruchtbarkeitsstörungen eines Mannes (a) und einer Frau (b) (in %).

### Wissen

In der Befragung zum Kenntnisstand der Studienteilnehmer zu Reproduktion und Fertilität erreichten nur 20 (4,0%) der 498 Befragten eine Punktzahl von mindestens 11 Punkten und zeigten damit ein gutes Wissen zum Thema. Die Mehrheit der Befragten (296 = 59,4%) hatte mit 6 bis 10 Punkten ein mäßiges Vorwissen, mehr als ein Drittel erreichten lediglich 5 oder weniger Punkte (182 = 36,5%), was einem geringen Wissensstand entspricht. Die MS ( $M = 7,39$ ,  $s = 2,01$ ) erreichten einen höheren Summenwert als die AS ( $M = 6,08$ ,  $s = 2,47$ ) und die BS ( $M = 5,61$ ,  $s = 2,27$ ) ( $F[2] = 25,02$ ,  $p < 0,001$ ). Auch erreichten bei den MS wesentlich mehr eine Punktzahl von mindestens 11 Punkten (7,8%) als bei den AS (3,2%) und den BS (1,3%) und signifikant weniger gehörten zur Gruppe mit geringen Kenntnissen (MS 17,0%, AS 41,1%, BS 50,3%). Frauen ( $M = 6,72$ ,  $s = 2,33$ ) waren signifikant besser informiert als die Männer ( $M = 5,73$ ,  $s = 2,35$ ) ( $F[1] = 21,11$ ,  $p < 0,001$ ).

Es bestand ein statistisch signifikanter gegenläufiger Zusammenhang zwischen dem Wissensstand der Probanden ( $r_s = -0,105$ ) und dem Risikoscore sowie mit der bereits erfolgten Auseinandersetzung mit dem Thema Fertilität in der Vergangenheit ( $r_s = -0,125$ ). Die gemeinsame Varianz ist hier allerdings sehr gering, ebenso wie für den (signifikanten) Zusammenhang des Wissensstands mit dem bereits erreichten höchsten Abschluss ( $r_s = 0,127$ ).

### Risikoverhalten der Probanden

Im Durchschnitt erreichten die Teilnehmer der Studie einen Risikosummscore von  $M = 3,50$  ( $s = 1,99$ , Min. = 0, Max. = 9). Die Unterscheidung der Berufsgruppen war dabei signifikant: BS ( $M = 4,39$ ,  $s = 2,09$ ) verhielten sich deutlich risikoreicher als AS ( $M = 3,55$ ,  $s = 1,78$ ) und MS ( $M = 2,57$ ,  $s = 1,79$ ) ( $F[2] = 35,83$ ,  $p < 0,001$ ). Frauen ( $M = 3,21$ ,  $s = 2,00$ ) leben signifikant risikoärmer als ihre männlichen Altersgenossen ( $M = 3,96$ ,  $s = 1,89$ ) ( $F[1] = 16,64$ ,  $p < 0,001$ ).

Eine besonders große Differenz bestand in der Häufigkeit des Nikotinkonsums. Von den MS gaben nur 10,5% der Befragten an, aktuell zu rauchen. Bei den AS waren es mit 18,0% immer noch

deutlich weniger als bei den BS, wo mehr als jede/r Zweite rauchte (51,6%) ( $F[2] = 46,87$ ,  $p < 0,001$ ).

### Kinderwunschmotive

Wie auch in der Befragung von Stöbel-Richter et al. [16] wurde die „Emotionale Stabilisierung und Sinnfindung“ als stärkster Beweggrund für das Kinderkriegen angesehen. Signifikante Unterschiede zwischen den befragten Gruppen oder zwischen Frauen und Männern gab es dabei nicht ( $F[2] = 0,36$ ;  $p = 0,7$  bzw.  $F[1] = 0,13$ ,  $p = 0,72$ ). „Persönliche Einschränkungen und Probleme“ ( $M = 2,35$ ,  $s = 0,68$ ) sowie „Unzureichende materielle und soziale Unterstützung“ ( $M = 2,23$ ,  $s = 0,64$ ) wurden von allen 3 Probandengruppen als wichtige Argumente gegen das Kinderkriegen bewertet. Es zeigte sich ein signifikanter Unterschied bei der Bewertung der materiellen Beeinträchtigungen, die von den MS ( $M = 2,17$ ,  $s = 0,59$ ) geringer eingeschätzt werden als von den AS ( $M = 2,21$ ,  $s = 0,65$ ) und den BS ( $M = 2,34$ ,  $s = 0,64$ ) ( $F[2] = 3,59$ ,  $p = 0,028$ ). „Soziale Anerkennung und Identitätsbildung“ der Eltern durch Kinder ist ebenfalls in allen 3 Gruppen eine wichtige Überlegung ( $M = 1,82$ ,  $s = 0,64$ , aber deutlich weniger beeinflussend als der emotionale Aspekt. Für Männer ( $M = 1,97$ ,  $s = 0,71$ ) ist die soziale Anerkennung signifikant wichtiger als für ihre weiblichen Altersgenossinnen ( $M = 1,73$ ,  $s = 0,58$ ) ( $F[1] = 16,62$ ,  $p < 0,001$ ).

Das ausgewählte Kinderwunschmotiv „Unzureichende materielle und soziale Unterstützung“ korrelierte positiv mit dem Risikoscore, die „Emotionale Stabilisierung und Sinnfindung“ negativ mit dem Wunsch nach mehr Information zum Thema Fertilitätsrisiken.

### Persönlichkeitsmerkmale

Bei der Betrachtung der Persönlichkeitsskalen des Big Five Inventory zeigten sich lediglich bei 2 Eigenschaftsdimensionen signifikante Unterschiede zwischen den befragten Gruppen. Dies war zum einen die Einschätzung der „Gewissenhaftigkeit“, welche die MS ( $M = 3,97$ ,  $s = 0,49$ ) für sich als zutreffender beschreiben als BS ( $M = 3,89$ ,  $s = 0,60$ ) und AS ( $M = 3,81$ ,  $s = 0,54$ ) ( $F[2] = 3,45$ ,  $p = 0,032$ ), zum anderen schätzten sich die befragten MS signifikant stärker in der „Offenheit für Erfahrung“ ( $M = 3,93$ ,  $s = 0,69$ )

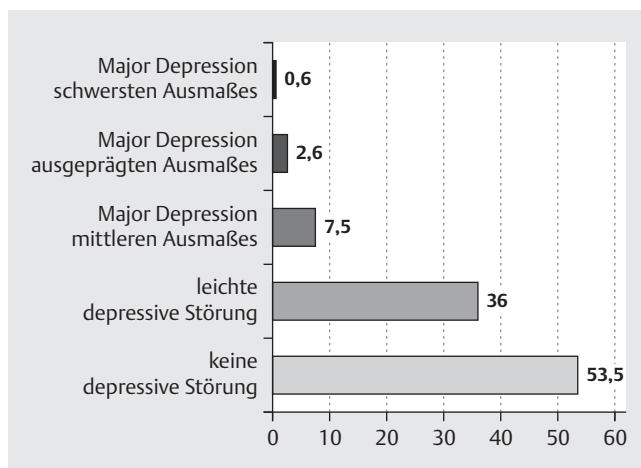

**Abb. 2** Verteilung der Skalensummenwerte für Depressivität in der Gesamtstichprobe (nach PHQ-Subgruppeneinteilung, in %).

ein als die AS ( $M = 3,83$ ,  $s = 0,70$ ) und die BS ( $M = 3,59$ ,  $s = 0,70$ ) ( $F[2] = 9,65$ ,  $p < 0,001$ ). Bezüglich Extraversion, Verträglichkeit und Neurotizismus fanden sich keine Unterschiede.

Die Korrelationen der Persönlichkeitsfaktoren mit den Variablen Wissensstand, Risikoscore und Informationswunsch waren nicht signifikant. Einzig die Korrelation zwischen Neurotizismus und dem Skalensummenwert Depressivität war erwartungsgemäß hoch positiv ( $r_s = 0,434$ ).

### Psychisches Befinden

Bei der Einschätzung der eigenen Depressivität im PHQ-D fielen signifikante Unterschiede vor allem zwischen den beiden Studiengruppen auf. Im Sinne der PHQ-Auswertung zeigten 53,5% der Befragten keine depressive Störung, 36,0% eine leichte depressive Störung und 10,7% eine Major Depression (7,5% mittleren Ausmaßes, 2,6% ausgeprägten Ausmaßes, 0,6% schwersten Ausmaßes, vgl. **Abb. 2**).

Die MS zeigten sich in der eigenen Einschätzung signifikant weniger depressiv ( $M = 4,06$ ,  $s = 3,50$ ) als die AS ( $M = 5,41$ ,  $s = 3,48$ ,  $P[F] = 0,017$ ) und beinahe signifikant weniger depressiv als die BS ( $M = 5,35$ ,  $s = 4,14$ ,  $P[F] = 0,078$ ). Zwischen den AS und den BS bestand kein signifikanter Unterschied.

Es zeigte sich ein signifikant gegenläufiger, aber geringer Zusammenhang zwischen dem Ausmaß der Depressivität und der bereits stattgefundenen Auseinandersetzung mit dem Thema Fertilität in der Vergangenheit. Dahingegen fand sich für den Skalensummenwert Depressivität und den Risikoscore eine hoch positive Korrelation ( $r_s = 0,458$ ).

Angesichts dieses Ergebnisses wurde mithilfe einer multiplen schrittweisen Regression geprüft, welche Variablen am besten geeignet sind, um den Risikosummenscore vorherzusagen. Als

Prädiktoren wurden zunächst die Variablen Wissensstand, Informationswunsch, Kinderwunschmotive, Persönlichkeitsmerkmale und Depressivität in die Analyse einbezogen. Das endgültige Modell umfasst signifikant positive Zusammenhänge für die Depressivität, (mangelndes) Wissen und hohe Werte auf der LKM-Skala „Persönliche Einschränkungen und Probleme“, die reflektiert, dass die Kinder eher als Problem erlebt werden (**Tab. 4**). Die anderen genannten Variablen zeigten keinen signifikanten Einfluss.

### Diskussion

Die vorliegende Befragung liefert wichtige Hinweise für eine spezifische gesundheitliche Aufklärung, mithilfe derer weiter steigende Zahlen ungewollt kinderloser Paare zu verhindern wären. Die Studie ist aufgrund der niedrigen Anzahl der Befragten und der gezielt angesprochenen Subgruppen nicht repräsentativ, allerdings konnte so eine recht homogene Stichprobe erhoben werden. Sie sollte mittels einer Repräsentativerhebung validiert werden. Eine weltweite Umfrage unter 17 500 Menschen, hauptsächlich ebenfalls im gebärfähigen Alter, aus 10 Ländern Europas, Afrikas, dem Mittleren Osten und Südamerika von 2006 [20] zeigte bereits ein starkes Wissensdefizit bezüglich Fertilität und Reproduktion, ein direkter Vergleich ist aber aufgrund der größeren Varianz soziodemografischer Merkmale nicht möglich.

Die in der vorliegenden Studie beschriebenen Ergebnisse zum Kenntnisstand der Probanden bestätigen dieses Wissensdefizit: Lediglich 4% der Gesamtstichprobe zeigten fundiertes Wissen, indem sie mindestens 11 von 16 gestellten Fragen richtig beantworteten konnten, über einem Drittel der Befragten (36,5%) gelang es nicht einmal, mehr als 5 Fragen korrekt zu beantworten, unter geringer gebildeten Berufsschülern waren dies sogar mehr als die Hälfte (50,32%). Das Wissen etwa über Beginn und Dauer der fruchtbaren Tage einer Frau sowie die Überlebenszeit der Spermien ist unabdingbar, um den Zeitpunkt für ungeschützten Geschlechtsverkehr abschätzen zu können [13]. Dies könnte erklären, weshalb 50% der Paare laut einer Studie von Pook et al. trotz Kinderwunsch keinen Geschlechtsverkehr während des optimalen Konzeptionszeitpunkts hatten [21].

Das steigende Alter der Frau wurde von den Teilnehmern der Studie zutreffend als maßgeblicher Risikofaktor für die Fertilität bewertet, allerdings zeigte sich bei näherem Nachfragen, dass auch hier genaue Kenntnisse fehlen: Die Abnahme der Fertilität der Frau um 50% wurde mit einem Durchschnittsalter von 40,02 Jahren angegeben. Damit verschätzten sich die Probanden um 5 Jahre [22]. Dieses Unterschätzen der Abnahme der weiblichen Fertilität mit steigendem Alter deckt sich mit den Ergebnissen vorangegangener Studien [5, 14], Bretherick et al. berichten über ein fehlendes Bewusstsein weiblicher Studierender der mit dem Alter rapide abnehmenden Fruchtbarkeit der Frau. Auch bei der Einschätzung anderer Faktoren, z.B. Rauchen oder Untergewicht,

**Tab. 4** Ergebnisse der schrittweisen linearen Regression – Kriterium Risikosummenscore.

| Prädiktor                                           | Beta    | t      | Signifikanz | korrigiertes R <sup>2</sup> | Änderung von R <sup>2</sup> t |
|-----------------------------------------------------|---------|--------|-------------|-----------------------------|-------------------------------|
| Skalensummenwert Depressivität                      | 0,441   | 10,58  | < 0,001     | 0,201                       | 0,202                         |
| Wissensstand                                        | - 0,109 | - 2,60 | 0,010       | 0,208                       | 0,009                         |
| LKM-Skala: persönliche Einschränkungen und Probleme | 0,096   | 2,29   | 0,023       | 0,215                       | 0,009                         |

Depressivität, Wissensstand und die LKM-Skala sagen signifikant das Risikoverhalten vorher mit einer maximalen Varianzaufklärung von 21,5%.

erkannten die Teilnehmer ein Risiko für die Fertilität. Allerdings ist es wahrscheinlich, dass die Probanden ihr Wissen über Risiken für die allgemeine Gesundheit zu Hilfe nahmen [13]. Dies zeigt sich auch in der Abstufung der Risikobewertung, bei der die 3 definitiv die Fertilität negativ beeinflussenden Lifestyle-Faktoren (steigendes Alter der Frau, Rauchen und Übergewicht [6]) nicht die ersten 3 Ränge einnehmen, sondern, neben den medizinischen Einflussfaktoren wie Krankheiten der Geschlechtsorgane und Hormonstörungen, z.B. der Einfluss von Drogen als weitaus schädlicher für die Fertilität eingeschätzt wird als beispielsweise die Adipositas. Alle signifikant verschiedenen bewerteten Risikofaktoren sind von den MS als stärker eingestuft worden als von den AS und BS. Deutliche Unterschiede ( $p < 0,001$ ) zeigten sich dabei in der Einschätzung von Hormonstörungen, Strahlung/Bestrahlung, Chemotherapie, Stress, Untergewicht, psychischer Belastung, Umweltbelastung, chronischen Krankheiten, Angststörung und Leistungssport, welche die MS aufgrund ihres medizinischen Vorwissens als signifikant gefährlicher für die Fertilität einschätzten als ihre nicht medizinisch gebildeten Altersgenossen.

Selbst wenn junge Männer und Frauen Risiken für eventuelle Fruchtbarkeitsstörungen kennen, heißt das noch längst nicht, dass sie diese auch vermeiden: In der vorliegenden Studie schätzten die BS Rauchen mit 4,38 von maximal 5 Punkten als starken Risikofaktor für die Fertilität ein, trotzdem fanden sich in dieser Befragungsgruppe mehr als 50% Raucher. Der Vergleich der Ergebnisse der MS mit den anderen beiden befragten Gruppen spricht für gute Aufklärung: Die MS sind signifikant besser informiert, schätzen sich selbst als gewissenhafter ein (laut Ergebnis des BFI-K) und verhalten sich deutlich risikoärmer als ihre Altersgenossen.

Hervorzuheben ist der Zusammenhang zwischen Depressivität und Risikoverhalten, der sich sowohl in den Korrelationen als auch in der Regressionsanalyse deutlich zeigte. In eine umfassende Aufklärung sollten somit auch psychosoziale Aspekte und ihre Bedeutung für eine Verhaltensänderung der Betroffenen aufgenommen werden, um Krankheiten der Psyche rechtzeitig erkennen und ggf. therapieren zu können. Eine Untersuchung von über 2000 schwangeren Frauen zeigte, dass eine Kumulation von negativen Lifestylefaktoren wie Rauchen, Alkohol, Tee-/Kaffeekonsum, Adipositas und soziale Ausgrenzung die Konzeptionswahrscheinlichkeit innerhalb eines Jahres reduzierte, nämlich von 83,3% ohne derartige Faktoren auf 38,4% mit 4 der genannten Einflüsse [7].

Die Regressionsanalyse des Leipziger Fragebogens zum Kinderwunsch zeigt, dass diejenigen der Befragten, die Kinder vor allem im Zusammenhang mit „Persönlichen Einschränkungen und Problemen“ sehen, auch einen risikoreicheren Lebensstil pflegen. Auch im Bereich kinderwunschbezogener Einstellungen könnte also ein Ansatzpunkt für Präventionskampagnen liegen.

Fast zwei Drittel der Befragten (62,4%) wünschen sich mehr Information zum Thema Fertilität und deren Risiken, z.B. in Form von Plakaten. Vor allem Frauen bejahten die Frage nach dem Informationswunsch (69,9%). Die vorliegende Studie zeigt damit ein Informationsbedürfnis junger Menschen auf, welches für den Erfolg von Präventionskampagnen wichtig ist und eine Basis für die Diskussion möglicher Strategien und Inhalte für die Verhütung von Fertilitätsstörungen darstellt.

## Fazit für die Praxis

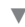

Wenn junge Paare die gynäkologische Sprechstunde wegen unerfüllten Kinderwunsches aufsuchen, ist es für präventive Ansätze in der Regel zu spät. Deshalb erscheint es in der gynäkologischen Praxis wichtig, bereits während der ersten Kontakte jungen Patientinnen im Sinne einer „Lebensstilberatung“ gesundheitsschädigende Auswirkungen auf die Fertilität zu erklären, auch wenn die Effektivität solcher Schritte bisher noch nicht belegt ist [12]. Noch besser wäre eine primärpräventive Aufklärung in Schulen, in deren Rahmen nicht nur die Verhütung von Schwangerschaften, sondern auch der Schutz der Fertilität Thema sein sollte.

## Interessenkonflikt

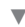

Nein.

## Literatur

- 1 Statistisches Bundesamt. Mikrozensus 2008 – Neue Daten zur Kinderlosigkeit in Deutschland. Begleitmaterial zur Pressekonferenz am 29. Juli 2009 in Berlin. Juli 2009, Wiesbaden
- 2 Höhn C, Ette A, Ruckdeschel K. Kinderwünsche in Deutschland. Konsequenzen für eine nachhaltige Familienpolitik. Bundesinstitut für Bevölkerungsforschung. Robert Bosch-Stiftung GmbH, Hrsg. Stuttgart: Steinkopf Druck; 2006
- 3 Sütterlin S, Hoßmann I. Berechnungen. Ungewollt kinderlos. Was kann die moderne Medizin gegen den Kindermangel in Deutschland tun? Berlin-Institut für Bevölkerung und Entwicklung, Hrsg. Köln: Gebrüder Kopp GmbH & Co. KG; 2007
- 4 Stöbel-Richter Y, Weidner K, Förster P et al. Familiengründung in Deutschland. Wie geplant sind Kinderwunsch, Schwangerschaft und Kinderlosigkeit? Gynäkologische Endokrinologie 2008; 6: 177–184
- 5 Wang YA, Healy D, Black DA et al. Age-specific success rate for women undertaking their first assisted reproduction technology treatment using their own oocytes in Australia, 2002–2005. Hum Reprod 2008; 23: 1633–1638
- 6 Homan GF, Davies M, Norman R. The impact of lifestyle factors on reproductive performance in the general population and those undergoing infertility treatment: a review. Hum Reprod Update 2007; 13: 209–223
- 7 Hassan MA, Killick SR. Negative lifestyle is associated with a significant reduction in fecundity. Fertil Steril 2004; 81: 384–392
- 8 Berger U, Wick K, Brix C et al. Primary prevention of eating related problems in the real world. J Public Health 2011; 19: 357–365
- 9 Künzle R, Mueller MD, Hänggi W et al. Semen quality of male smokers and nonsmokers in infertile couples. Fertil Steril 2003; 79: 287–291
- 10 Baron JA, La Vecchia C, Levi F. The antiestrogenic effect of cigarette smoking in women. Am J Obstet Gynecol 1990; 162: 502–514
- 11 Anderson K, Nisenblatt V, Norman RJ. Lifestyle factors in people seeking infertility treatment – A review. Aust N Z J Obstet Gynaecol 2010; 50: 8–20
- 12 Anderson K, Norman RJ, Middleton P. Preconception lifestyle advice for people with subfertility. Cochrane Database Syst Rev 2010; 4: CD008189
- 13 Bunting L, Boivin J. Knowledge about infertility risk factors, fertility myths and illusory benefits of healthy habits in young people. Hum Reprod 2008; 23: 1858–1864
- 14 Bretherick KL, Fairbrother N, Avila L et al. Fertility and aging: do reproductive-aged Canadian women know what they need to know? Fertil Steril 2010; 93: 2162–2168
- 15 Carl C, Bengel J, Strauß B. Gewollte Kinderlosigkeit aus psychologischer Perspektive. Reproduktionsmedizin 2000; 16: 28–36
- 16 Stöbel-Richter Y, Beutel ME, Finck C et al. The ‘wish to have a child’, childlessness and infertility in Germany. Hum Reprod 2005; 20: 2850–2857
- 17 Rammstedt B, John OP. Kurzversion des Big Five Inventory (BFI-K): Entwicklung und Validierung eines ökonomischen Inventars zur Erfassung der fünf Faktoren der Persönlichkeit. Diagnostica 2005; 51: 195–206

- 18 Gräfe K, Zipfel S, Herzog W *et al.* Screening psychischer Störungen mit dem „Gesundheitsfragebogen für Patienten (PHQ-D)“ Ergebnisse der deutschen Validierungsstudie. *Diagnostica* 2004; 50: 171–181
- 19 Herpertz S, Köllner V. Gesundheitsverhalten und Psychotherapie. *Psychotherapie im Dialog* 2008; 9: 317–318
- 20 World Fertility Awareness Month. What you never know about fertility [Brochure]. 2006
- 21 Pook M, Tuschen-Caffier B, Krause W *et al.* Psychische Gesundheit und Partnerschaftsqualität idiopathisch infertiler Paare. In: Brähler E, Felder H, Strauß B, Hrsg. Fruchtbarkeitsstörungen. *Jahrbuch der Medizinischen Psychologie*. Band 17. Göttingen: Hogrefe; 2000: 262–271
- 22 Dunson DB, Colombo B, Baird DD. Changes with age in the level and duration of fertility in the menstrual cycle. *Hum Reprod* 2002; 17: 1399–1403
